# Supplementary material for: Broccoli Cultivated with Deep Sea Water Mineral Fertilizer Enhances Anti-Cancer and Anti-Inflammatory Effects of AOM/DSS-Induced Colorectal Cancer in C57BL/6N Mice
Source: MDPI journal article supplement (doi:10.3390/ijms25031650), 2024-01-29
Supplement: s1 [file s1]

**Table S2. Mineral contents of broccoli.** CFB: Conventional Farming Broccoli; SFB: Seawater Fertilizer Broccoli; TFB: Trace element Fertilizer Broccoli; NFB: Naturaldream Fertilizer Broccoli. Means with the different letters (a-d) above the bars are significantly different ( $p < 0.05$ ) by Duncan's multiple range test.

| mg/kg      | Na                           | Mg                           | Ca                           | K                              | Zn                        | Fe                        | Mn                        | Cu                       |
|------------|------------------------------|------------------------------|------------------------------|--------------------------------|---------------------------|---------------------------|---------------------------|--------------------------|
| <b>CFB</b> | 1040.81 ± 15.47 <sup>c</sup> | 2056.50 ± 16.37 <sup>b</sup> | 3884.87 ± 17.65 <sup>a</sup> | 31219.95 ± 164.75 <sup>b</sup> | 52.95 ± 0.36 <sup>b</sup> | 58.63 ± 0.23 <sup>c</sup> | 29.78 ± 0.94 <sup>b</sup> | 4.41 ± 0.09 <sup>b</sup> |
| <b>SFB</b> | 1242.42 ± 1.88 <sup>a</sup>  | 1954.40 ± 8.08 <sup>c</sup>  | 3939.72 ± 7.93 <sup>a</sup>  | 31177.77 ± 77.16 <sup>b</sup>  | 48.02 ± 0.33 <sup>d</sup> | 60.15 ± 0.15 <sup>c</sup> | 28.90 ± 1.25 <sup>b</sup> | 4.14 ± 0.11 <sup>c</sup> |
| <b>TFB</b> | 829.95 ± 4.00 <sup>d</sup>   | 1772.48 ± 12.10 <sup>d</sup> | 3629.82 ± 2.00 <sup>b</sup>  | 31203.18 ± 153.23 <sup>b</sup> | 54.60 ± 0.38 <sup>a</sup> | 64.43 ± 1.44 <sup>b</sup> | 32.90 ± 1.03 <sup>a</sup> | 4.19 ± 0.08 <sup>c</sup> |
| <b>NFB</b> | 1180.15 ± 9.86 <sup>b</sup>  | 2193.48 ± 20.73 <sup>a</sup> | 3933.98 ± 59.71 <sup>a</sup> | 32415.70 ± 190.01 <sup>a</sup> | 50.47 ± 0.14 <sup>c</sup> | 68.00 ± 1.35 <sup>a</sup> | 27.91 ± 0.99 <sup>b</sup> | 4.76 ± 0.13 <sup>a</sup> |
