# Supplementary material for: Broccoli Cultivated with Deep Sea Water Mineral Fertilizer Enhances Anti-Cancer and Anti-Inflammatory Effects of AOM/DSS-Induced Colorectal Cancer in C57BL/6N Mice
Source: MDPI journal article supplement (doi:10.3390/ijms25031650), 2024-01-29
Supplement: s1 [file s1]

**Table S1. Mineral content analysis results for each fertilizer.**

| <b>mg/kg</b>                    | <b>Na</b> | <b>Mg</b> | <b>Ca</b> | <b>K</b> | <b>Fe</b> | <b>P(PO<sub>4</sub>)</b> | <b>Si</b> | <b>Cl</b> | <b>N</b> | <b>B</b> |
|---------------------------------|-----------|-----------|-----------|----------|-----------|--------------------------|-----------|-----------|----------|----------|
| <b>Seawater Fertilizer</b>      | 6879      | 808       | 282       | 261      | 1.11      | -                        | -         | 1700      | -        | -        |
| <b>Trace element Fertilizer</b> | 1339      | 3432      | 698       | 9784     | 23938     | 7.37                     | 8182      | -         | -        | -        |
| <b>Naturaldream Fertilizer</b>  | 9565      | 60000     | 49.5      | 11588    | N.D       | 10.8                     | 0.61      | 14700     | 27       | 179      |
